# Supplementary material
Source: PubMed Central journal article supplement (PMC6869659)
Supplement: HBM-36-3246-s001.pdf [file HBM-36-3246-s001.pdf]

## ROI

visual

somatosensory

motor

## Beta

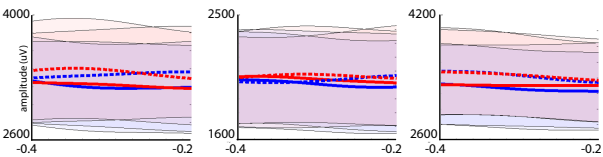

## Alpha

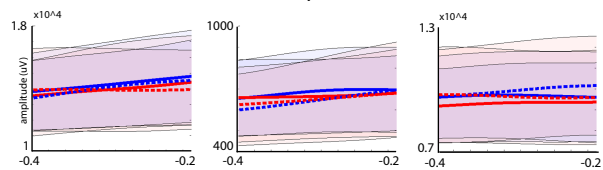

## Delta

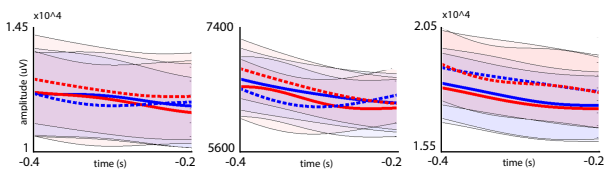

visual/ regular ■ visual/ irregular ▄  
 tactile/ regular ■ tactile/ irregular ▄
