# Supplementary material
Source: PubMed Central journal article supplement (PMC6869659)
Supplement: HBM-36-3246-s003.pdf [file HBM-36-3246-s003.pdf]

# ROI

visual

somatosensory

motor

## Delta

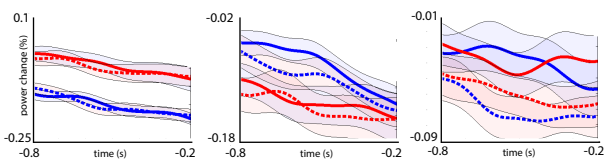

visual/ regular ■ visual/ irregular ⋯  
tactile/ regular ■ tactile/ irregular ⋯
