# Supplementary material
Source: PubMed Central journal article supplement (PMC6869659)

# ROI

visual

somatosensory

motor

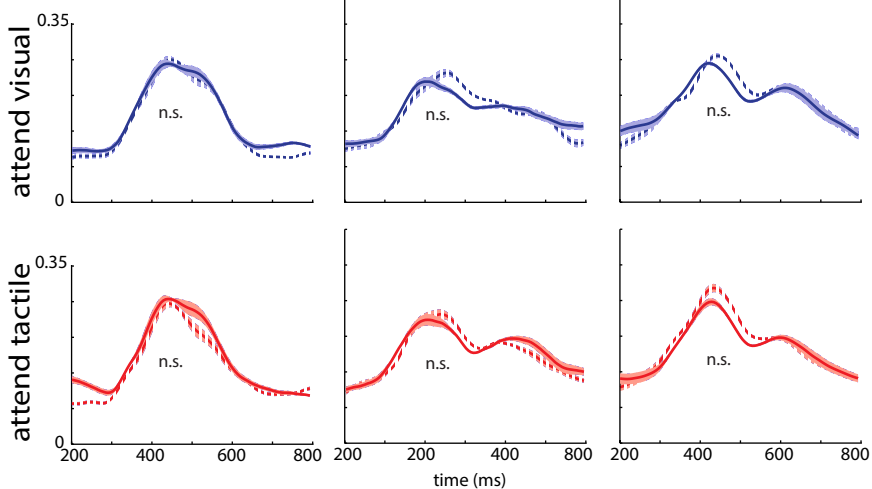

visual/ regular  visual/ irregular 

tactile/ regular  tactile/ irregular 

Supplement: HBM-36-3246-s004.pdf [file HBM-36-3246-s004.pdf]
